# Supplementary material for: Separation of amino acid enantiomers by a capillary modified with a metal–organic framework
Source: Royal Society of Chemistry journal article supplement (doi:10.1039/c6ra02741e), 2016-01-01
Supplement: c6ra02741e1.pdf [file c6ra02741e1.pdf]

## Electronic Supplementary Information

---

### **Separation of amino acid enantiomers by a capillary modified with a metal-organic framework**

*Neng-Sheng Ye<sup>a</sup>, Ji-Chao Ma<sup>a</sup>, Jian-Xin An<sup>a</sup>, Jian Li<sup>b</sup>, Zhi-Min Cai<sup>a</sup> and Han Zong<sup>a</sup>*

---

<sup>a</sup>*Department of Chemistry, Capital Normal University, Beijing 100048, P. R. China*

<sup>b</sup>*Beijing Institute of Veterinary Drugs Control, Beijing, 102600 P. R. China*

**Figure S1**

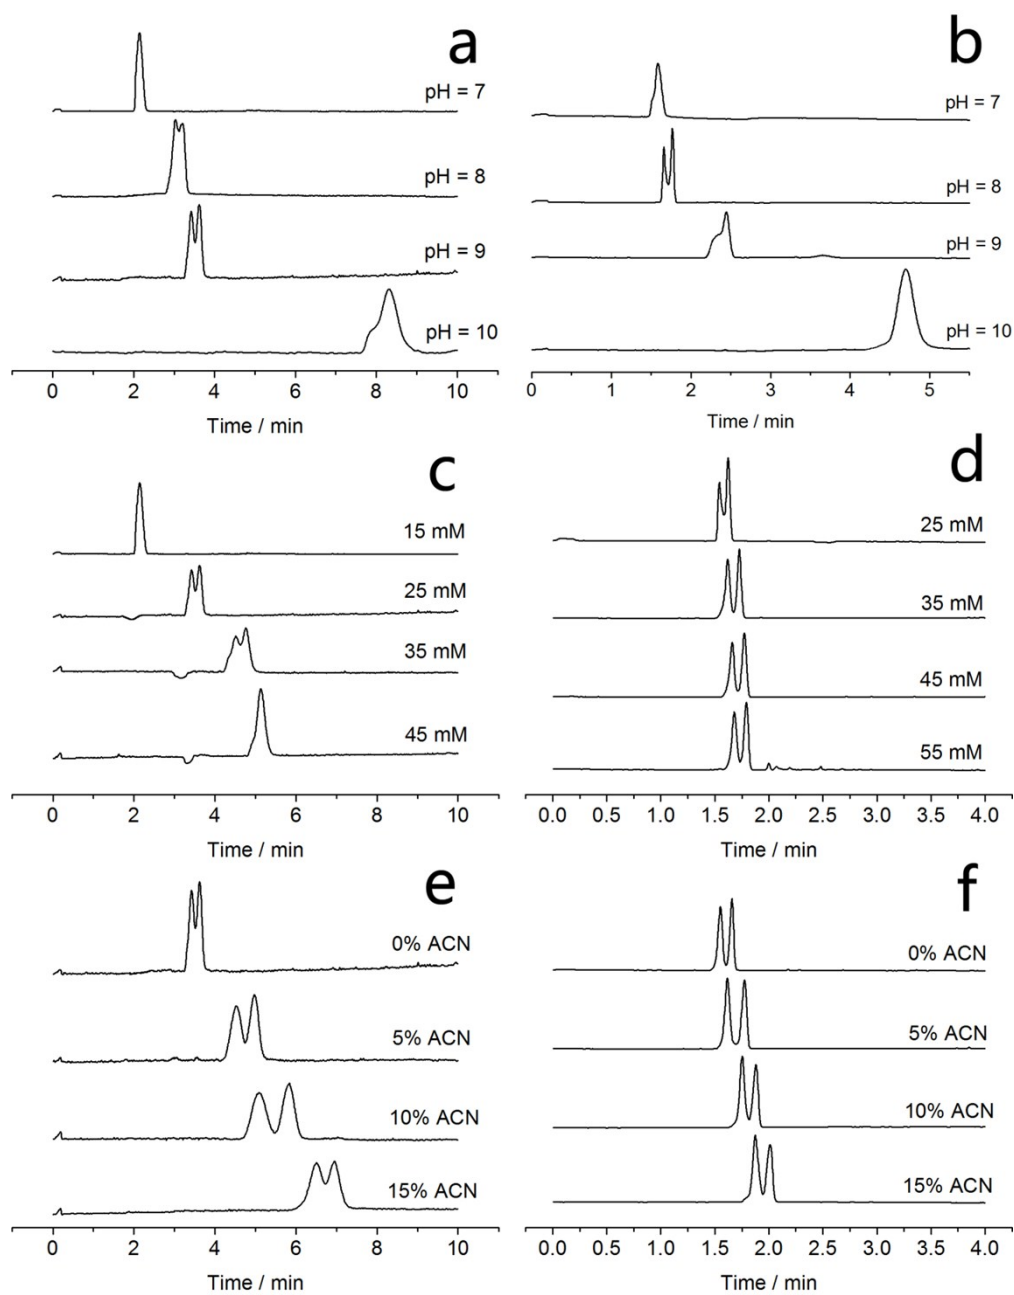

**Figure S1.**

Optimization of buffer conditions (a, c, e) for DL-phenylalanine and (b, d, f) for DL-tyrosine.
